1 **Assessing the multiple dimensions of poverty. Data mining**  
2 **approaches to the 2004-14 Health and Demographic**  
3 **Surveillance System in Cuatro Santos, Nicaragua.**

4 Carina Källestål<sup>a,e\*</sup>, Elmer Zelaya Blandón<sup>b,c</sup>, Rodolfo Peña<sup>a,f</sup>, Wilton Pérez<sup>a</sup>, Mariella  
5 Contreras<sup>a</sup>, Lars-Åke Persson<sup>a,e</sup>, Oleg Sysoev<sup>d</sup>, Katarina Ekholm Selling<sup>a</sup>

6 a Department of Women's and Children's Health, Uppsala University, Uppsala,  
7 Sweden

8 b Asociación para el Desarrollo Económico y Sostenible de El Espino (APRODESE)  
9 Chinandega, Nicaragua

10 c Nicaraguan Autonomous National University, León (UNAN-León), Nicaragua

11 d Department of Computer and Information Science, Linköping University, Sweden

12 e Department of Disease Control, London School of Hygiene & Tropical Medicine,  
13 London, UK

14 f Pan American Health Organization, Tegucigalpa, Honduras

15

16 \* Corresponding author: Associate professor Carina Källestål,  
17 London School of Hygiene & Tropical Medicine, Keppel Street, London WC1E 7HT,  
18 UK

19 Phone number +251 (0)902468747 (Ethiopia) and +46 703043309 (International)

20 E-mail: [carina.kallestal@lshtm.ac.uk](mailto:carina.kallestal@lshtm.ac.uk)

21

22 Short title: Assessing the multiple dimensions of poverty

23 Abstract

24 We aimed to describe multiple dimensions of poverty according to the capability  
25 approach theory by applying data mining approaches to the Cuatro Santos Health  
26 and Demographic Surveillance databases, Nicaragua. Four municipalities in northern  
27 Nicaragua constitute the Cuatro Santos area, with 25,893 inhabitants in 5,966  
28 households (2014). A local process analyzing poverty-related problems and  
29 prioritizing suggested actions, was initiated 1997 based on a community action plan  
30 2002-2015. Priority interventions were school breakfasts, environmental protection,  
31 water and sanitation, preventive healthcare, home gardening, micro credits, technical  
32 training, stipends for university education, and the use of Internet. In 2004, a survey  
33 of basic health and demographic information was performed in the whole population  
34 followed by surveillance updates in 2007, 2009, and 2014 linking households and  
35 individuals by unique identifiers. Information included the house (floor, walls) and  
36 services (water, sanitation, electricity) as well as demographic data (birth, deaths,  
37 migration). Data on participation in interventions, on food security, household assets,  
38 and women's self-rated health were collected in 2014. A K-means algorithm were  
39 used to cluster the household data (54 variables). The poverty ranking of household  
40 clusters using the unsatisfied basic needs index (UBN) variables changed when  
41 including variables describing basic capabilities. The households in the fairly rich  
42 cluster, having assets as motorbikes and computers were described as modern.  
43 Those in the fairly poor cluster, having different degrees of food insecurity were  
44 labeled vulnerable. Poor and poorest clusters of households were traditional e.g. in  
45 using horses for transport. Results displayed a society transforming from traditional  
46 to a modern, where the forerunners were not the richest but educated, had more  
47 working members of household, fewer children and were food secure. Those lagging

48 were the poor, traditional and food insecure. The approach and results may be useful  
49 for an improved understanding of poverty and to direct local interventions.

50

51 Key words: multidimensional poverty, capability approach, health and demographic  
52 surveillance, data mining, K-means clustering, poverty alleviation

53

54 Word count abstract: 299, main text incl., tables: 5,729

55

## 56 Introduction

57 The first of the Sustainable Development Goals aims at ending poverty in all its  
58 forms, everywhere. This is further specified as reducing by 2030 at least by half the  
59 proportion of men, women, and children of all ages that currently live in poverty in all  
60 its dimensions according to national definitions (our underscore) (1). This all-inclusive  
61 target addresses all dimensions of poverty, the most important determinant for health  
62 and wellbeing (2).

63 Poverty measures used by the World Bank and many international agencies are  
64 usually monetary measures on the national level, such as the poverty line at 1,90  
65 purchasing power parity dollar and the Gross Domestic Product per capita. These  
66 monetary measures of poverty are possible to compare over time and across  
67 nations. In Latin America the Unsatisfied Basic Need (UBN) index has been widely  
68 used to compare poverty at the household level between different geographical areas  
69 (3, 5). UBN is a composite index that includes housing conditions, access to water  
70 and sanitation, school enrolment, education of the head of household, and the ratio  
71 of dependent household members to working age members. In the Demographic  
72 Health Surveys household asset scores have been widely used as a measurement of  
73 household socioeconomic status and poverty (5). Asset scores have been used to  
74 stratify other outcomes along a wealth axis, such as the identification and explanation  
75 of social inequalities in health (6). Asset scores cannot be used to follow or compare  
76 development over time since each index is only valid for the survey for which it was  
77 created.

78 The Commission on Global Poverty, assigned by the World Bank (7) has  
79 recommended the inclusion of complementary indicators when tracking poverty  
80 change over time and across settings. Further, the Commission has suggested the

81 capability approach to poverty formulated by Amartya Sen and others as a  
82 framework to aid the development of indicators (8, 9).

83 The capability approach focuses on individuals and prioritizes the freedom of choice  
84 a person has over alternative lives that she or he could live (9). In this approach, the  
85 fundamental and intertwined concepts are capabilities and functions. In practice, it is  
86 often easier to evaluate achieved functions, representing the accomplished  
87 capabilities. People show adaptive preferences to their environment by adjusting  
88 their expectations to the surrounding social, cultural, political, and economic  
89 restrictions. Frequently capabilities cannot be converted to functions, thus indicating  
90 the need of equality in capabilities and functioning (10).

91 Amartya Sen and others have discussed whether basic capabilities should be  
92 captured in indices or decided upon by the poor themselves (8). In most cases, the  
93 basic capabilities included are adequate health, sufficient food and nutrition,  
94 adequate education to ensure basic knowledge, capability of independent thought  
95 and expression, political participation, and freedom of race, religion, and gender  
96 discrimination (10). Several indices capture multiple basic capabilities, such as the  
97 Multidimensional Poverty Index (11).

98 Governments have the responsibility to implement policies for poverty reduction to  
99 reach the first Sustainable Development Goal (12). Local level bottom-up  
100 interventions might, however, result in sustainable poverty reduction that might  
101 inspire decision makers at the national level. We have documented such a case in  
102 northern Nicaragua; the Cuatro Santos experiences of local poverty reduction (13).  
103 That case study showed that factors such as local ownership, locally guided  
104 multidimensional interventions, and close monitoring and evaluation of the

105 development efforts yielded a substantial poverty reduction of household poverty  
106 from 79 to 47 % over a ten year period (2004-14) (13).

107 In the Cuatro Santos area, a Health and Demographic Surveillance System (HDSS)  
108 was established in 2004 with the latest update in 2014. Participation in micro credit  
109 programs, the involvement of young individuals in technical training, and home  
110 gardening were associated with the transition of households out of poverty (14). The  
111 Unsatisfied Basic Needs scoring of households was used to identify geographic  
112 areas with higher levels of poverty to target interventions (13). However, poverty  
113 indices, such as the Unsatisfied Basic Needs or asset scores, have limitations for a  
114 context-specific description of poverty. To address this problem, a data mining  
115 method, a variant of the K-means clustering algorithm (15), is an alternative  
116 approach to identify patterns, which might describe poverty in a local context in a  
117 multidimensional way. Thus, this paper's aims to describe the multiple dimensions of  
118 poverty according to the capability approach theory by using data mining approaches  
119 to the Cuatro Santos Health and Demographic Surveillance databases, Nicaragua.

120

## 121 **Methods**

### 122 **Study setting, population, and design**

123 The Cuatro Santos area, situated in the northern part of Chinandega, Nicaragua,  
124 consists of four municipalities of similar population size. In 2014 totally 25,893  
125 inhabitants lived in 5,966 households in an area located 250 km northwest of the  
126 capital of Nicaragua, Managua, in a mountainous terrain bordering Honduras. The  
127 climate is predominantly dry and the traditional sources of income have been the  
128 cultivation of grains and raising livestock, now with an increasing number of small-

129 scale enterprises. This area was strongly affected by the Contras war in the 1980s  
130 and the hurricane Mitch in October 1998. Since that time a significant proportion of  
131 the population has out-migrated due to economic reasons, including fixed or  
132 seasonal work or search for employment (16).

133 *-Fig 1 in somewhere here-*

134 *Fig 1. The Cuatro Santos area showing the four municipalities and health facilities.*

135 *The area is marked in the inserted Nicaragua map.*

136

### 137 **Community interventions in Cuatro Santos**

138 Starting in 1997, representatives of the four municipalities, the local non-  
139 governmental organizations, local government leaders, and representatives of  
140 national institutions initiated a process labeled “decoding reality”, which was inspired  
141 by Paulo Freire (17). This process included an analysis of the local poverty-related  
142 problems, prioritization among suggested actions, and an action plan that was  
143 approved as the Cuatro Santos Area Development Strategy 2002 to 2015. This  
144 strategy aimed at efforts to develop the area by use of local resources, informed by  
145 data from the surveillance system, and to attract international cooperation. The  
146 concepts of local ownership and participation were central, and the efforts included  
147 consensus decision-making and reconciliation in case of conflicts. Priority  
148 interventions were school breakfasts, environmental protection, water and sanitation,  
149 preventive healthcare, home gardening, micro credits, technical training, stipends for  
150 university education, and telecommunications including access to and training in the  
151 use of Internet. Data collection through a Health and Demographic Surveillance

152 System was central for monitoring of trends over time, and research evaluation of  
153 various aspects (13,14).

#### 154 **Cuatro Santos Health and Demographic Surveillance System**

155 In 2004, a census and cross-sectional data collection of basic health and  
156 demographic information was performed in the whole population. Follow-up surveys  
157 were performed in 2007, 2009, and 2014. Unique identifiers of households and  
158 individuals linked the data. Demographic changes in the households, such as birth,  
159 death, and migration, were registered. Household data included information on the  
160 house (floor, walls) and services (water, sanitation, electricity). All women aged 15–  
161 49 years living in the households provided retrospective reproductive histories (14).  
162 In the 2009 and 2014 updates, questions were included on participation in the  
163 following interventions: access to water and latrines, micro credit, home gardening,  
164 technical education, school breakfast programs, and telecommunications. In the  
165 2014 update, data on food security, household assets, and women’s self-rated health  
166 were collected. For the present study, data from the 2014 update including data on  
167 earlier events and interventions were used.

168 Fieldwork conducted by local female fieldworkers was carefully supervised, printed  
169 forms were checked before computerization, and the forms were returned to the field  
170 if the information was missing or suspected to be incorrect. Further data quality  
171 controls were completed after computerization including logical controls. Data were  
172 carefully cleaned and stored in a relational database (Microsoft Access 2007®).

#### 173 **Variables (see Table 1)**

174 Persons residing in a household at the time of the field survey defined the household.  
175 Migration was defined as a household member aged 18–65 who migrated in or out of



176 the household since the previous update (5 yrs.). The Unsatisfied Basic Needs index  
177 (16) was composed by four components: (I) housing conditions (unsatisfied: walls of  
178 wood, cardboard, plastic or earthen floor); (II) access to water and latrine  
179 (unsatisfied: water from river, well, or bought in barrels and no latrine or toilet); (III)  
180 school enrolment of children (unsatisfied: any children 7–14 years of age not  
181 attending school); and (IV) education of head of the family and ratio of dependent  
182 (<15 yrs. and >65 yrs.) household members working-age members (15-65 yrs.)  
183 (unsatisfied: head of the family illiterate or dropped out of primary school and ratio of  
184 dependent household members working-age members > 2.0). Each component  
185 rendered a score of zero, if satisfied, and one, if unsatisfied. Thus, the total sum  
186 varied from zero to four. Households with zero or one unsatisfied basic needs were  
187 considered non-poor, while poor households had two to four unsatisfied basic needs.  
188 Characteristics of houses and households were also included in the cluster analyses,  
189 such as the material of walls, floor, access to electricity, type of stove, access to  
190 water, and type of toilet. The interventions implemented in the area were represented  
191 by household-related information on such participation. The presence of a water  
192 meter indicated that the household had got water installed as part of the last  
193 decade's interventions. Also, information was included on previous and current  
194 participation in home gardening, if anyone in the household had received micro  
195 credits or had participated in technical training.

196 A nine-item Household Food Insecurity Access Scale (HFIAS), version 3, was used  
197 (18). The respondents were either the head of the household or the person  
198 responsible for the household expenditure and food preparation during the last four  
199 previous weeks. This scale covers experiences regarding 1) anxiety in the household  
200 due to lack of food; 2) inability to eat preferred food because of lack of resources; 3)

201 limited variety of food due to lack of resources; 4) consumption of few kinds of food  
202 because of lack of resources; 5) reduction of portion sizes of meals due to lack of  
203 food; 6) consumption of fewer meals per day because of lack of food; 7) no food to  
204 eat in the household because lack of resources; 8) going to sleep at night hungry due  
205 to lack of food, and 9) days of hunger because of insufficient amounts of food to eat.

206 For each affirmative answer, the person provided additional information on the  
207 frequency in a four-point scale (never, rarely, sometimes, often).

208 Household assets were TV antenna, car, motorbike, bike, horse, refrigerator, sewing  
209 machine, computer, tortilla oven, and a chimney for the wood-burning stove.

210 The individual variables collected 2014 were derived and aggregated at the  
211 household level, and thereafter merged with the variables at household level. We  
212 constructed variables on births and deaths in the household during the recent update  
213 period, also including information on under-5 death, number of adults and children  
214 living in the household, number of adults and children working, number of adults not  
215 working, and the ratio between adults working and not working, as well as the ratio  
216 between adults working and number of individuals in the household. Further, data  
217 were included on in- and out-migration, including from foreign countries, gender of  
218 household head, any illiteracy, and the highest education level in the household  
219 (none, primary, secondary, technical, university education). Information was also  
220 included if a home-, health center-, or hospital birth had happened since the last  
221 update (5yrs).

222 Women's self-rated health was assessed for all resident women of reproductive age  
223 (15–49 years) at time of the interview by a five-point Likert scale based on the  
224 following question: "In general, how would you assess your health today?" The  
225 interviewer provided the following options: very good, good, medium, bad, or very

226 bad. This information was classified as good (very good, good, medium) or bad (bad,  
227 very bad) health. No household had a mix of good and bad self-assessed health  
228 when aggregating this information to household level. The total dataset included 54  
229 variables.

## 230 **Analytical methods**

231 All analyses were performed on the household level. The variables included are  
232 displayed in Table 1. A variant of the K-means clustering algorithm (15) called  
233 SimpleKMeans in Weka (19) was used to perform a clustering of our data. The  
234 reason for choosing K-means algorithm was that K-means is “the most popular and  
235 the simplest partitional algorithm” (20). The K-means algorithm computes K points  
236 called centroids and then assigns the data points to their respective closest centroid.  
237 This leads to forming K groups (clusters) of observations in the data where  
238 observations within each cluster have similar properties. To evaluate the quality of  
239 the clustering, data were split into training and test sets. Cluster centroids were  
240 computed from the training data and tested on the test data by using the closest-  
241 centroid-principle. Properties of the training and test clusters were compared and the  
242 robustness was evaluated.

243 Categorical variables were transformed into dummy variables and included in the K-  
244 means cluster analysis and after being scaled, the numerical variables were also  
245 included in the analysis. Repeated analyses were performed forcing data into 2 to  
246 10 clusters. Default values were taken for all other settings of the algorithm. A so-  
247 called scree plot was created displaying cluster Sums of Squared Errors (y-axis) and  
248 number of clusters (x-axis) (S2 Figure, Supplemental Figure 1). An appropriate  
249 number of clusters in the plot can be found by identifying the level of the x variable  
250 where the saturating starts. Six clusters were selected after inspection of this scree

251 plot and checking cluster sizes. The Euclidian distance was applied and the data  
252 were randomly split into training (66 %) and test (44 %) sets. The meaning of the  
253 clusters was interpreted by evaluating the cluster centroids (percentages for dummy  
254 variables of categorical variables and averages for numerical variables) in each  
255 cluster in relation to each other and to the full data.

256 Variable groups of categories were analyzed in a stepwise order to generate an  
257 assessment of poverty. These categories were included in the following order: a)  
258 poverty assessed by the variables poverty and UBN and variables in UBN except  
259 head of household's education, children's school enrolment, and ratio dependents to  
260 working household members, b) assets, c) food insecurity, d) interventions, e)  
261 derived individual variables (see Table 1 for included variables, and Supplemental  
262 Table 1 for full cluster analysis output where the categories are color marked). The  
263 emerging patterns were evaluated and the clusters were labeled in words as reported  
264 in results. Table 2 shows the essential variables extracted from Supplemental Table  
265 1, yielding the labeling words.

## 266 **Ethical considerations**

267 The information was collected as part of the Health and Demographic Surveillance  
268 update survey in 2014. The Ethical Review Board of Biomedical Research at the  
269 National Autonomous University of León approved the HDSS data collection  
270 (FWA00004523/IRB0000334 ACTA No. 81). Informed verbal consent was obtained  
271 from the participants. They were free to end their participation at any time. Data were  
272 stored in a safe electronic platform with an alphanumeric identification number  
273 instead of names of participants to protect confidentiality.

274

## 275 **Results**

276 Of the 5,966 households included in the 2014 update of the HDSS, 5,253 (88 %)  
277 were included in the analyses after eliminating households with missing values on  
278 any variable. The major reasons to omissions were houses included in the database  
279 as households while, in fact, not being living quarters, e.g., schools, health centers,  
280 or abandoned houses. Included data measured experiences since the last update (5  
281 yrs.) and earlier participation in interventions. The basic characteristics of the  
282 households are shown in Table 1.

283

284 Table 1. List of variables included in the analyses of Cuatro Santos database,  
 285 Nicaragua 2014, including descriptive statistics.

| Categorical variables           | Labels                                                                          | n     | %    |
|---------------------------------|---------------------------------------------------------------------------------|-------|------|
| Poverty                         | 0 Not poor = UBN 0-1                                                            | 2828  | 53.8 |
|                                 | 1 Poor = UBN 2-4                                                                | 2425  | 46.2 |
| Unsatisfied Basic Needs (UBN)   | 0 No basic need unsatisfied                                                     | 1161  | 22.1 |
|                                 | 1 Wall is made of wood, cartons, plastic AND mud floor                          | 1667  | 31.7 |
|                                 | 2 Access to water is through rivers, wells, or bought in barrels AND no latrine | 2167  | 41.3 |
|                                 | 3 Children ages 7 to 14 years are not attending school                          | 251   | 4.8  |
|                                 | 4 The head is illiterate or not completed primary school AND dependency ratio>2 | 7     | 0.1  |
| House wall type                 | 1 Ceramic brick                                                                 | 1,465 | 27.9 |
|                                 | 2 Adobe/wattle wall                                                             | 3,707 | 70.6 |
|                                 | 3 Wood                                                                          | 31    | 0.6  |
|                                 | 4 Palm                                                                          | 3     | <0.1 |
|                                 | 5 Cardboard, Plastic, Metal                                                     | 42    | 0.8  |
|                                 | 6 Without walls                                                                 | 5     | <0.1 |
| Water availability              | 1 Indoor pipe                                                                   | 1,807 | 34.4 |
|                                 | 2 Commune post                                                                  | 117   | 2.2  |
|                                 | 3 Own well                                                                      | 1,117 | 21.3 |
|                                 | 4 Communal well                                                                 | 1,538 | 29.3 |
|                                 | 5 River/Creek                                                                   | 410   | 7.8  |
|                                 | 6 Purchased water                                                               | 6     | 0.1  |
|                                 | 7 Other sources                                                                 | 258   | 4.9  |
| Toilet type                     | 1 Toilet                                                                        | 133   | 2.5  |
|                                 | 2 Latrine                                                                       | 4,123 | 78.5 |
|                                 | 3 No toilet/latrine                                                             | 997   | 19.0 |
| Floor in house                  | 1 Ceramic brick                                                                 | 418   | 8.0  |
|                                 | 2 Brick/cement                                                                  | 272   | 5.2  |
|                                 | 3 Mud brick                                                                     | 42    | 0.8  |
|                                 | 4 Tiling                                                                        | 1,567 | 29.8 |
|                                 | 5 Mud floor                                                                     | 2,954 | 56.2 |
| Electricity in house            | 1 Yes                                                                           | 4,683 | 89.1 |
|                                 | 2 No                                                                            | 570   | 10.8 |
| Stove in house                  | 1 Gas                                                                           | 469   | 8.9  |
|                                 | 2 Wood/improved                                                                 | 75    | 1.4  |
|                                 | 3 Wood/normal                                                                   | 4,664 | 88.8 |
|                                 | 4 Does not have                                                                 | 45    | 0.9  |
| Water meter in use              | 1 Yes                                                                           | 1,130 | 21.5 |
|                                 | 2 No                                                                            | 4,123 | 78.5 |
| Micro credits in HH*            | 1 Yes                                                                           | 671   | 12.8 |
|                                 | 2 No                                                                            | 4,582 | 87.2 |
| Technical training in HH*       | 1 Yes                                                                           | 514   | 9.8  |
|                                 | 2 No                                                                            | 4,739 | 90.2 |
| Home garden in HH*              | 1 Yes                                                                           | 321   | 6.1  |
|                                 | 2 No                                                                            | 4,932 | 93.9 |
| Home garden in use              | 1 Yes                                                                           | 197   | 3.8  |
|                                 | 2 No                                                                            | 5,056 | 96.2 |
| Anxiety in HH* for lack of food | 0 Never                                                                         | 705   | 13.4 |
|                                 | 1 Rarely (1-2 times)                                                            | 2,106 | 40.1 |
|                                 | 2 Sometimes (3-10 times)                                                        | 1,303 | 24.8 |
|                                 | 3 Often (> 10 times)                                                            | 1,139 | 21.7 |

|                                                                |                          |       |      |
|----------------------------------------------------------------|--------------------------|-------|------|
| Inability in HH* to eat preferred food                         | 0 Never                  | 692   | 13.2 |
|                                                                | 1 Rarely (1-2 times)     | 2,216 | 42.2 |
|                                                                | 2 Sometimes (3-10 times) | 1,803 | 34.3 |
|                                                                | 3 Often (> 10 times)     | 542   | 10.3 |
| Limited variation of food in HH* due to lack of food           | 0 Never                  | 989   | 18.8 |
|                                                                | 1 Rarely (1-2 times)     | 2,421 | 46.1 |
|                                                                | 2 Sometimes (3-10 times) | 1,440 | 27.4 |
|                                                                | 3 Often (> 10 times)     | 403   | 7.7  |
| Few kinds of food consumed in HH* due to lack of food          | 0 Never                  | 896   | 17.1 |
|                                                                | 1 Rarely (1-2 times)     | 2,584 | 49.2 |
|                                                                | 2 Sometimes (3-10 times) | 1,427 | 27.2 |
|                                                                | 3 Often (> 10 times)     | 346   | 6.6  |
| Reduction of portion sizes of meals in HH* due to lack of food | 0 Never                  | 1,307 | 24.9 |
|                                                                | 1 Rarely (1-2 times)     | 2,524 | 48.0 |
|                                                                | 2 Sometimes (3-10 times) | 1,166 | 22.2 |
|                                                                | 3 Often (> 10 times)     | 256   | 4.9  |
| Fewer meals consumed in HH* due to lack of food                | 0 Never                  | 2,016 | 38.4 |
|                                                                | 1 Rarely (1-2 times)     | 2,167 | 41.3 |
|                                                                | 2 Sometimes (3-10 times) | 892   | 17.0 |
|                                                                | 3 Often (> 10 times)     | 178   | 3.4  |
| No food to eat in HH* due to lack of resources                 | 0 Never                  | 3,734 | 71.1 |
|                                                                | 1 Rarely (1-2 times)     | 1,132 | 21.5 |
|                                                                | 2 Sometimes (3-10 times) | 335   | 6.4  |
|                                                                | 3 Often (> 10 times)     | 52    | 1.0  |
| HH* going to sleep hungry due to lack of food                  | 0 Never                  | 4,478 | 85.2 |
|                                                                | 1 Rarely (1-2 times)     | 564   | 10.7 |
|                                                                | 2 Sometimes (3-10 times) | 189   | 3.6  |
|                                                                | 3 Often (> 10 times)     | 22    | 0.4  |
| HH* having days of hunger due to insufficient amount of food   | 0 Never                  | 4,744 | 90.3 |
|                                                                | 1 Rarely (1-2 times)     | 367   | 7.0  |
|                                                                | 2 Sometimes (3-10 times) | 124   | 2.4  |
|                                                                | 3 Often (> 10 times)     | 18    | 0.3  |
| TV antenna in HH*                                              | 1 Parabolic antenna      | 604   | 11.5 |
|                                                                | 2 Normal antenna         | 2,069 | 39.4 |
|                                                                | 3 Handmade antenna       | 429   | 8.2  |
|                                                                | 4 No antenna             | 2,151 | 40.9 |
| Car in HH*                                                     | 1 Yes                    | 137   | 2.6  |
|                                                                | 2 No                     | 5,116 | 97.4 |
| Motorbike in HH*                                               | 1 Yes                    | 443   | 8.4  |
|                                                                | 2 No                     | 4,810 | 91.6 |
| Bike in HH*                                                    | 1 Yes                    | 872   | 16.6 |
|                                                                | 2 No                     | 4,381 | 83.4 |
| Horse in HH*                                                   | 1 Yes                    | 1,347 | 25.6 |
|                                                                | 2 No                     | 3,906 | 74.4 |
| Refrigerator in HH*                                            | 1 Yes                    | 1,567 | 29.8 |
|                                                                | 2 No                     | 3,686 | 70.2 |
| Sewing machine in HH*                                          | 1 Yes                    | 337   | 6.4  |
|                                                                | 2 No                     | 4,916 | 93.6 |
| Computer in HH*                                                | 1 Yes                    | 183   | 3.5  |
|                                                                | 2 No                     | 5,070 | 96.5 |
| Tortilla oven in HH*                                           | 1 Yes                    | 916   | 17.4 |
|                                                                | 2 No                     | 4,337 | 82.6 |
| Stove with chimney in HH*                                      | 1 Yes                    | 103   | 2.0  |
|                                                                | 2 No                     | 5,150 | 98.0 |
| Deaths in HH*                                                  | 0 No deaths in HH*       | 4,934 | 93.9 |
|                                                                | 1 Deaths in HH*          | 319   | 6.1  |
| Births in HH*                                                  | 0 No births in HH*       | 3,907 | 74.4 |
|                                                                | 1 Births in HH*          | 1,346 | 25.6 |

|                                                                 |                                                    |       |      |
|-----------------------------------------------------------------|----------------------------------------------------|-------|------|
| Immigration in HH*                                              | 0 No immigration in HH*                            | 3,206 | 61.0 |
|                                                                 | 1 Immigration in HH*                               | 2,047 | 39.0 |
| Emigration in HH*                                               | 0 No emigration in HH*                             | 2,289 | 43.6 |
|                                                                 | 1 Emigration in HH*                                | 2,964 | 56.4 |
| Sex of HH head                                                  | 1 Female head of HH*                               | 1,382 | 26.3 |
|                                                                 | 2 Male head of HH*                                 | 3,871 | 73.7 |
| Illiterate living in HH*                                        | 0 No illiterate in HH*                             | 3,812 | 72.6 |
|                                                                 | 1 Illiterate in HH*                                | 1,441 | 27.4 |
| Highest education in HH*                                        | 0 No education                                     | 208   | 4.0  |
|                                                                 | 2 Primary school                                   | 1,679 | 32.0 |
|                                                                 | 3 Secondary school                                 | 2,312 | 44.0 |
|                                                                 | 4 Technical education                              | 379   | 7.2  |
|                                                                 | 5 University education                             | 675   | 12.8 |
| HH* member immigrated from foreign country                      | 0 No immigration from another country in household | 4,928 | 93.8 |
|                                                                 | 1 Immigration from other country in HH*            | 325   | 6.2  |
| HH* member emigrated to foreign country                         | 0 No emigration to another country in HH*          | 4,560 | 86.8 |
|                                                                 | 1 Emigration to another country in HH*             | 693   | 13.2 |
| Child/ren (<15 yrs.) in HH* working                             | 0 No                                               | 5,172 | 98.4 |
|                                                                 | 1 Yes                                              | 81    | 1.5  |
| Home birth in HH*                                               | 0 No home birth in HH*                             | 5,143 | 97.9 |
|                                                                 | 1 Home birth in HH*                                | 110   | 2.1  |
| Hospital birth in HH*                                           | 0 No hospital birth in HH*                         | 4,153 | 79.1 |
|                                                                 | 1 Hospital birth in HH*                            | 1,100 | 20.9 |
| Child health center birth in HH*                                | 0 No CHC birth in HH*                              | 4,892 | 93.1 |
|                                                                 | 1 CHC birth in HH*                                 | 361   | 6.9  |
| Under 5 death in HH*                                            | 0 No                                               | 5,195 | 98.9 |
|                                                                 | 1 Yes                                              | 58    | 1.1  |
| Women's self-rated health in HH*                                | 0 No women with bad health in HH*                  | 2,963 | 56.4 |
|                                                                 | 1 Women with bad health in HH*                     | 2,290 | 43.6 |
| <b>Continuous variables</b>                                     |                                                    |       |      |
|                                                                 | Mean (Median)                                      | Min   | Max  |
| No of children in HH*                                           | 1.7 (2.0)                                          | 0     | 12   |
| No of adults in HH*                                             | 4.7 (4.0)                                          | 0     | 19   |
| No in HH* not working                                           | 2.6 (2.0)                                          | 0     | 13   |
| No in HH* working                                               | 1.4 (1.0)                                          | 0     | 9    |
| No of working adults (>=15 yrs.) in HH*                         | 1.4 (1.0)                                          | 0     | 9    |
| No of not working adults (>=15 yrs.) in HH*                     | 1.7 (1.0)                                          | 0     | 8    |
| No of individuals in HH*                                        | 6.5 (6.0)                                          | 1     | 25   |
| Ratio of adults working to not working in HH*                   | 1.6 (1.0)                                          | 0     | 9    |
| Ratio of working adults (>=15 yrs.) to no of individuals in HH* | 0.2 (0.2)                                          | 0     | 1    |

286 \*HH=household

## 287 Cluster analyses

288 The patterns emerging from the variables separating the clusters the most (in the  
289 following text these variables are called essential variables), extracted from S1

290 Appendix, Supplemental Table 1, and the labeling of clusters is illustrated in Table 2.



291 Table 2. Meaningful variables used in the analysis of clusters illustrating naming of clusters. (Extracted from S1 Appendix, Supplemental Table 1, categories  
 292 color marked as follows: Grey= Poverty assessed by the variable poverty, Light blue = variables in UBN, except head of household's education, children's  
 293 school enrolment, and dependency ratio, Dark yellow = assets, Turquoise = food insecurity, Green = interventions, Light Yellow = derived individual variables)

| Variables         | Full Data | Cluster 0 | Cluster 1 | Cluster 2 | Cluster 3 | Cluster 4 | Cluster 5 | Ranking highest-lowest | Comment to interpretation                                                                                                                                                                                                                                                                                                       |
|-------------------|-----------|-----------|-----------|-----------|-----------|-----------|-----------|------------------------|---------------------------------------------------------------------------------------------------------------------------------------------------------------------------------------------------------------------------------------------------------------------------------------------------------------------------------|
| N = 5253 (n)      | (3466)    | (688)     | (540)     | (253)     | (752)     | (699)     | (534)     | ! extreme cluster      |                                                                                                                                                                                                                                                                                                                                 |
| %                 | 66 of N   | 20        | 16        | 7         | 22        | 20        | 15        |                        |                                                                                                                                                                                                                                                                                                                                 |
| Poor              | 0.4616    | 0.9985    | 0         | 0.5178    | 0         | 0.9986    | 0.1573    | 4,0,2,5,1,3            | Yielded ranking seen in Table 3                                                                                                                                                                                                                                                                                                 |
| InPipe            | 0.348     | 0.0291    | 0.6278    | 0.3992    | 0.5598    | 0.0229    | 0.5787    | 1,5,3,2,4,0            |                                                                                                                                                                                                                                                                                                                                 |
| OwnWell           | 0.204     | 0.2791    | 0.1259    | 0.2095    | 0.137     | 0.3076    | 0.1423    | 4,0,2,5,3,1            |                                                                                                                                                                                                                                                                                                                                 |
| ComWell           | 0.2969    | 0.4128    | 0.1519    | 0.2332    | 0.2114    | 0.4793    | 0.206     | 4,0,2,3,5,1            |                                                                                                                                                                                                                                                                                                                                 |
| MudFloor          | 0.5655    | 0.9767    | 0.3167    | 0.6917    | 0.1902    | 0.9657    | 0.2322    | 0,4,2,1,5,3            |                                                                                                                                                                                                                                                                                                                                 |
| NoLatrine         | 0.1939    | 0.3241    | 0.1093    | 0.2253    | 0.0918    | 0.2976    | 0.1049    | 0,4,2,1,5,3            |                                                                                                                                                                                                                                                                                                                                 |
| Satellite_antenna | 0.1145    | 0.0073    | 0.1       | 0.0237    | 0.1848    | 0.03      | 0.3221    | 5,3,1,4,2,0            | Yielded name "modern"                                                                                                                                                                                                                                                                                                           |
| MCYes             | 0.0822    | 0.0087    | 0.0519    | 0.0158    | 0.1423    | 0.0243    | 0.2303    | 5,3,1,4,2,0            |                                                                                                                                                                                                                                                                                                                                 |
| Fridge            | 0.2995    | 0.0959    | 0.2852    | 0.1304    | 0.492     | 0.1173    | 0.6236    | 5,3,1,2,4,0            |                                                                                                                                                                                                                                                                                                                                 |
| Computer          | 0.0343    | 0         | 0.0259    | 0.0079    | 0.0479    | 0.0043    | 0.1199    | 5,3,1,2,4,0            | Yielded name "traditional"                                                                                                                                                                                                                                                                                                      |
| HorseYes          | 0.2574    | 0.327     | 0.1981    | 0.249     | 0.2287    | 0.2804    | 0.2416    | 0,4,2,5,3,1            |                                                                                                                                                                                                                                                                                                                                 |
| BreadOven         | 0.1725    | 0.1802    | 0.1759    | 0.2016    | 0.1636    | 0.1803    | 0.1479    | 2,4,0,1,3,5            |                                                                                                                                                                                                                                                                                                                                 |
| FI5Never          | 0.2545    | 0.1061    | 0.1056    | 0.0158    | 0.1529    | 0.1588    | 0.9775    | 5!,4,2,3,0,1           | In cluster 2, 62-4% reported different levels of food insecurity, while almost 100% in cluster 5 never reported it. Yielded name "vulnerable"                                                                                                                                                                                   |
| FI5Often          | 0.0488    | 0.0044    | 0.0093    | 0.6206    | 0         | 0.0043    | 0.0019    | 2!,1,0,4,1,5           |                                                                                                                                                                                                                                                                                                                                 |
| FI6Never          | 0.3883    | 0.2311    | 0.2796    | 0.0474    | 0.3777    | 0.3019    | 0.9906    | 5!,3,4,1,0,2           |                                                                                                                                                                                                                                                                                                                                 |
| FI6Often          | 0.0352    | 0.0029    | 0.0093    | 0.4387    | 0.0013    | 0.0043    | 0         | 2!,1,4,0,3,5           |                                                                                                                                                                                                                                                                                                                                 |
| FI7Never          | 0.7074    | 0.6308    | 0.6759    | 0.2530    | 0.7793    | 0.6724    | 0.9981    | 5!,3,1,4,0,2           |                                                                                                                                                                                                                                                                                                                                 |
| FI7Often          | 0.0107    | 0.0029    | 0         | 0.1344    | 0         | 0.0014    | 0         | 2!,0,4,1/3/5           |                                                                                                                                                                                                                                                                                                                                 |
| FI9Often          | 0.0032    | 0         | 0         | 0.0435    | 0         | 0         | 0         | 2!                     |                                                                                                                                                                                                                                                                                                                                 |
| WaterMeter        | 0.2132    | 0.0116    | 0.3574    | 0.2372    | 0.3763    | 0.0172    | 0.3427    | 3,1,5,2,4,0            | Modern clusters (5,3,1) had most interventions except home garden and garden still in use, which was common in "vulnerable" cluster 2                                                                                                                                                                                           |
| Microloan         | 0.1269    | 0.0392    | 0.1593    | 0.0672    | 0.2021    | 0.0701    | 0.2041    | 5,3,1,4,2,0            |                                                                                                                                                                                                                                                                                                                                 |
| Garden            | 0.0641    | 0.0291    | 0.1037    | 0.1028    | 0.0691    | 0.0658    | 0.0412    | 1,2,3,4,5,0            |                                                                                                                                                                                                                                                                                                                                 |
| UseGarden         | 0.0378    | 0.0116    | 0.0556    | 0.0553    | 0.0412    | 0.0486    | 0.0262    | 1,2,4,3,5,0            |                                                                                                                                                                                                                                                                                                                                 |
| HHindividuals     | 6.457     | 6.423     | 6.7574    | 7.0791    | 6.5691    | 6.2933    | 5.9588    | 2,1,3,0,4,5            | More household members and illiterates in poor and vulnerable clusters compared to the modern rich, while higher education, foreign emigration and hospital birth was more common in the modern and rich clusters. Modern clusters showed higher proportions of female heads, which yielded the name "female head of household" |
| HHRW              | 1.6083    | 1.3876    | 1.4179    | 1.4572    | 1.6796    | 1.66      | 1.9887    | 5,3,4,2,1,0            |                                                                                                                                                                                                                                                                                                                                 |
| FemHead           | 0.2634    | 0.2253    | 0.3       | 0.2767    | 0.2806    | 0.2361    | 0.2809    | 1,5,3,2,4,0            |                                                                                                                                                                                                                                                                                                                                 |
| Illit             | 0.2752    | 0.3939    | 0.2574    | 0.4308    | 0.2035    | 0.3076    | 0.1255    | 2,0,4,1,3,5            |                                                                                                                                                                                                                                                                                                                                 |
| UnivEduc          | 0.1304    | 0.0378    | 0.137     | 0.0751    | 0.1848    | 0.0443    | 0.3052    | 5,3,1,2,4,0            |                                                                                                                                                                                                                                                                                                                                 |
| ForeignEm         | 0.1339    | 0.1076    | 0.1241    | 0.1225    | 0.1649    | 0.1087    | 0.1723    | 3,5,1,4,0,2            |                                                                                                                                                                                                                                                                                                                                 |
| HospitalBirth     | 0.2118    | 0.1831    | 0.2259    | 0.1621    | 0.2181    | 0.2189    | 0.2397    | 5,1,4,3,0,2            |                                                                                                                                                                                                                                                                                                                                 |

295 Poverty assessed by the first category, i.e., the dichotomized variable poverty and  
296 the 5 UBN categories (0-4) and the variables characterizing the household physical  
297 conditions and the water and sanitation conditions (S1 Appendix, Supplemental  
298 Table 1, and Table 2) yielded a ranking by poverty status as shown in Table 3 with  
299 essential variables being *poor*, *water source*, *mud floor* and *no latrine*.

300 Table 3. Results from cluster analysis of first ranking using Unsatisfied Basic Needs  
301 (UBN) variables from the Health and Demographic Surveillance System, Cuatro  
302 Santos, Nicaragua.

---

| Cluster<br>(% of HH <sup>2</sup> ) | Poverty <sup>1</sup> |
|------------------------------------|----------------------|
| 4 (20%)                            | Poorest              |
| 0 (20%)                            | Poor                 |
| 2 (7%)                             | Fairly poor          |
| 5 (15%)                            | Fairly rich          |
| 1(16%)                             | Rich                 |
| 3 (22%)                            | Richest              |

---

303 1. Rich and poor refers to our UBN categories and household characteristics included in the UBN  
304 2. HH=households  
305

306 Cluster 5 (Table 3) showed to be the most modern cluster having assets that were  
307 modern equipment like satellite dish antenna, computer, refrigerator, motorbike.  
308 Clusters 3 and 1 had also these assets but to a lesser extent. Clusters 0, 2, and 4  
309 were more traditional with assets as horses and tortilla bread ovens in higher  
310 proportions, illustrating that transportation and earnings of living by selling tortillas  
311 were carried out as in earlier times. These assets yielded the names traditional and  
312 modern.

313 The distribution of food insecurity variables showed that cluster 2 (7% of households)  
314 was far more food insecure than all other clusters including all aspects of food

315 security and that cluster 5 was food secure. These characteristics added the  
316 descriptive word vulnerable.

317 The most modern, richest and least vulnerable cluster had participated most in  
318 interventions. One exception was home gardening and still using a garden, which  
319 was more common among the traditional, and vulnerable clusters, especially the food  
320 insecure cluster 2. The latter intervention had however, reached few households. The  
321 essential variables were water meter, micro credit, technical training and home  
322 gardening.

323 When including all variables, the re-ranking displayed clusters of multidimensional  
324 poverty and the derived individual variables made this new ranking more distinct  
325 (Table 4). More household members and children were found in poor and vulnerable  
326 clusters compared to the modern rich, while higher education was more common in  
327 the modern and rich clusters. Overall, female and male-headed household  
328 proportions were  $\frac{1}{4}$  and  $\frac{3}{4}$ , respectively and the more modern clusters showed  
329 higher proportions of female heads, which rendered the descriptive word female  
330 head of household in naming of clusters. The following were the most essential of the  
331 derived individual variables; number of household individuals, ratio of adults working  
332 to those not working, female/male household head, illiterate individuals in household,  
333 university education in household, foreign emigration in household, and hospital birth,  
334 which all strengthened the multidimensional poverty group ranking and modern or  
335 traditional labeling.

336

337 Table 4. Results from cluster analysis second ranking including all variables from the  
338 Health and Demographic Surveillance System, Cuatro Santos, Nicaragua.

| Cluster<br>(% of HH <sup>2</sup> ) | Multidimensional poverty <sup>1</sup>              |
|------------------------------------|----------------------------------------------------|
| 2 (7%)                             | Fairly poor, most vulnerable, fairly traditional   |
| 0 (20%)                            | Poor, traditional                                  |
| 4 (20%)                            | Poorest, traditional                               |
| 1 (16%)                            | Rich, fairly modern, female head of household      |
| 3 (22%)                            | Richest, fairly modern, female head of household   |
| 5 (15%)                            | Fairly rich, most modern, female head of household |

339 1. Rich and poor refers to our Unsatisfied Basic Needs (UBN) categories and household  
340 characteristics included in the UBN, while modern and traditional refer to assets, interventions,  
341 number of adults and children in household, education, emigration, and hospital births. Vulnerable  
342 refers to food security and female head of household to proportion of female-headed households  
343 2. HH=households  
344

## 345 Discussion

346 This study is unique as it assesses multidimensional poverty using data at household  
347 level with a large number of variables taking advantage of a data mining technique.  
348 Variables assessing household conditions, food insecurity, access to interventions,  
349 demographic and mortality events were used. We found six clusters of households  
350 with differences between them, and with similarities within them, based on their  
351 shared variables.

352 The ranking of households using the unsatisfied basic needs index (UBN) variables  
353 in the cluster analysis were changed when including more variables describing basic  
354 capabilities. Most importantly, the fairly rich cluster 5 showed to be the most modern,  
355 with modern assets such as motorbikes and computers. The fairly poor cluster 2  
356 showed to be the most vulnerable, having varying degrees of food insecurity,  
357 something that the most modern cluster never experienced. The poor and poorest  
358 clusters were traditional, illustrated by the use of horses for transport. Men headed

359 two-thirds of households, but the proportion headed by women were higher among  
360 the modern rich. Altogether, the results pointed at a traditional society in transition to  
361 becoming modern. The forerunners were educated, had more working members in  
362 the household, had fewer children and were food secure but were not the richest  
363 according to the Unsatisfied Basic Needs characteristics. While those lagging were  
364 the poor, traditional and food insecure.

365 The importance of food insecurity was illustrated by the fairly poor becoming the  
366 most vulnerable in the multidimensional poverty analysis. It should be noted that the  
367 finding that participation in interventions, as for instance getting water installed,  
368 receiving a microloan, or engaging in technical training coincides with better welfare.

369 The Health and Demographic Surveillance data have been judged to be of high  
370 quality (13, 14) and covered the whole population in the Cuatro Santos area with very  
371 few non-participants, thereby providing a reliable basis for analyzes. The temporality  
372 of poverty predictors (a predictor happening before poverty) was not fully captured by  
373 our design. Based on the dates of the initiation of the interventions stored in our  
374 database, however, we can state that most interventions happened before the 2014  
375 survey. The timing of acquisition of assets was neither known, nor did we know when  
376 the head of household was established, although analyses have shown stability over  
377 time of household head. Food insecurity answers covered experiences during the  
378 last four weeks before survey.

379 Cluster analysis is a powerful method to identify hidden groups in the data, and K-  
380 means is an algorithm, which is fast, simple to use and interpret. Compared to some  
381 other clustering methods, number of clusters can be visually selected on the scree  
382 plot. It is worth mentioning that the Euclidian distance was used, in which categorical  
383 variables were transformed to dummy variables and the continuous variables were

384 scaled. These metrics are very general and do not rely on any application  
385 assumptions. Our cluster analysis has, however, some limitations. Firstly, K-means  
386 clustering optimizes the distances to the cluster centroids which means that spherical  
387 clusters are relatively easy to detect but if a cluster has a complicated shape, K-  
388 means clustering might split this into two or more parts. Secondly, all variables were  
389 included in the distance measure of the cluster analysis, including potentially  
390 irrelevant variables. This might in theory lead to blurring of some clusters, although in  
391 our analysis, we managed to obtain well-interpretable clusters with clearly distinct  
392 properties.

393 The interpretation and the choice of descriptive names of clusters was a subjective  
394 exercise that depend on the analyst's pre-understanding. The naming can, however  
395 easily be reviewed by studying Supplemental Table 2 which displays the cluster  
396 analysis.

397 Food insecurity is essential for wellbeing as shown in the multidimensional analysis  
398 of poverty. This was also reflected in the association between low self-rated health  
399 and food insecurity in a previous study from our group using data from the same  
400 surveillance system (21).

401 Interventions, such as water installation, micro credits, and participation in  
402 educational activities, positively influenced welfare, confirming our earlier results (14).

403 The randomized controlled trials evaluation of multifaceted programs in six countries  
404 have comparison villages (22) and a recent publication tried to accomplish  
405 comparisons for the Millennium development villages evaluation (23), both reporting  
406 positive results for complex interventions aiming for increased welfare in poor areas.

407 The Cuatro Santos case study (13) has no comparison area so we cannot rule out  
408 that the general transformation of the Nicaraguan society is a reason for the

409 improvements in welfare seen in the area. The finding in this analysis of multiple  
410 dimensions of poverty do however, provide some support that the interventions  
411 contributed to poverty reduction.

412 The Health and Demographic Surveillance data did not cover all aspects of basic  
413 capabilities. Even so, we consider having captured the multidimensionality of poverty  
414 stressed by the capability approach. We would like to argue that the results were  
415 meaningful, comprehensible and familiar in the area, based on a feedback and  
416 inference discussion held in the area with local community leaders and  
417 representatives of different sectors of society including health and security as well as  
418 lay people from the communities. These local community representatives confirmed  
419 the usefulness of this and similar further analyses for targeting interventions  
420 intending to reduce inequity.

## 421 **Conclusion**

422 The classification of households from rich to poor based on the unsatisfied basic  
423 needs assessment was modified by a multidimensional analysis of poverty. The  
424 “fairly rich” households based on the unsatisfied basic needs index were the  
425 forerunners of modern lifestyle with higher welfare, while the fairly poor were the  
426 most food insecure. Results obtained from a cluster analysis may be useful for  
427 increased understanding of poverty. Health and Demographic Surveillance data,  
428 maybe enhanced by computer applications, could be analyzed and guide priority  
429 setting and direct interventions to increase general welfare.

430

## 431 **Supporting information**

432 S1 Appendix

433 Supplemental Table 1. Cluster analysis output with the categories color marked as  
434 follows: Grey= Poverty assessed by the variables poverty and Unsatisfied Basic  
435 Needs (UBN), Light blue = variables in UBN, except head of household's education,  
436 children's school enrolment, and dependency ratio, Dark yellow = assets, Turquoise  
437 = food insecurity, Green = interventions, Light Yellow = derived individual variables.

438

439 S2 Figure

440 Supplemental figure 1. Scree plot displaying within cluster Sums of Squared Errors  
441 (y-axis) and number of clusters (x-axis) from K-means cluster analysis of data from  
442 Cuatro Santos Health and Demographic Surveillance System, 2014

443

## 444 **References**

- 445 1. UN. The Sustainable Development Goal 1. Accessed 5.29.18 from:  
446 <https://sustainabledevelopment.un.orgsdg>
- 447 2. OECD. Economic well-being. In: OECD Framework for Statistics on the  
448 Distribution of Household Income, Consumption and Wealth. 2013. pp. 1–15.
- 449 3. Hammill M. Income poverty and unsatisfied basic need. Mexico City: ECLAC;  
450 2009 Dec 10.
- 451 4. Peña, R., Pérez, W., Meléndez, M., Källestål, C., Persson, L.-Å. The Nicaraguan  
452 Health and Demographic Surveillance Site, HDSS-Leon: a platform for public  
453 health research. Scand J Public Health 2008;36: 318–25.  
454 doi:10.1177/1403494807085357



- 455 5. Howe LD, Galobardes B, Matijasevich A, Gordon D, Johnston D, Onwujekwe O,  
456 et al. Measuring socio-economic position for epidemiological studies in low- and  
457 middle-income countries: a methods of measurement in epidemiology paper.  
458 International Journal of Epidemiology. 2012 Jul 13;41(3):871–86.  
459 doi:10.1093/ije/dys037
- 460 6. Barros AJ, Ronsmans C, Axelson H, Loaiza E, Bertoldi AD, França GV, et al.  
461 Equity in maternal, newborn, and child health interventions in Countdown to 2015:  
462 a retrospective review of survey data from 54 countries. The Lancet. 2012 Mar  
463 31;379(9822): 1225–33. doi:10.1016/S0140-6736(12)60113-5
- 464 7. World Bank. Monitoring Global Poverty: Report of the Commission on Global  
465 Poverty. Washington, DC: World Bank; 2016 Nov pp. 1–263. doi: 10.1596/978-1-  
466 4648-0961-3.
- 467 8. Clark DA. The Capability Approach: Its Development, Critiques and Recent  
468 Advances GPRG-WPS-032. 2005; Dec 21: 1–18.
- 469 9. Sen A. “Justice: Means versus Freedoms...” Philosophy Public Affairs.  
470 1990;19(2): 111–21.
- 471 10. Cosgrove S, Curtis B. Understanding global poverty. London and New York:  
472 Routledge; 2018.
- 473 11. Alkire S, Santos ME. A Multidimensional Approach: Poverty Measurement &  
474 Beyond. Soc Indic Res. 2013 Feb 13;112(2): 239–57.
- 475 12. Días Langou G, Florito J. Starting strong. Implementation of social SDGs in Latin  
476 America. Overseas Development Institute, Southern Voice on Post-MDG  
477 International Development Goals, Gala Diaz Langou, Florito J, editors. 2016 Dec  
478 pp. 1–30.

- 479 13. Blandón EZ, Källestål C, Peña R, Pérez W, Berglund S, Contreras M, et al.  
480 Breaking the cycles of poverty: Strategies, achievements, and lessons learned in  
481 Los Cuatro Santos, Nicaragua, 1990–2014. *Global Health Action*. 2017;10: 1–12.
- 482 14. Pérez W, Zelaya Blandón E, Persson L-Å, Peña R, Källestål C. Progress towards  
483 millennium development goal 1 in northern rural Nicaragua: Findings from a  
484 health and demographic surveillance site. *Int J Equity Health*. 2012;11: 43.
- 485 15. Lloyd S. Least squares quantization in PCM. *IEEE transactions on information*  
486 *theory*. 1982 Mar;28(2): 129–37.
- 487 16. Gustafsson C. For a better life.... PhD Thesis, Umeå University. 2014. pp. 1–358.  
488 Available from: <http://umu.diva-portal.org/>
- 489 17. Au W. The dialectical materialism of Paulo Freire’s critical pedagogy. *REA*. 2017  
490 Aug 23;25(2): 171–95.
- 491 18. Ballard TJ, Kepple AW, Cafiero C. The Food Insecurity Experience Scale. 2013.  
492 Technical Paper. Rome, FAO. (available at [http://www.fao.org/economic/ess/ess-](http://www.fao.org/economic/ess/ess-fs/voices/en/)  
493 [fs/voices/en/](http://www.fao.org/economic/ess/ess-fs/voices/en/)).
- 494 19. Witten IH, Frank E, Hall MA, Pal CJ. *The WEKA Workbench*. 4 ed. San  
495 Francisco: Morgan Kaufmann Publishers Inc; 2016.
- 496 20. Jain, A. K. Data clustering: 50 years beyond K-means. *Pattern recognition letters*.  
497 2010; 31(8): 651-66.
- 498 21. Pérez, W., Contreras M, Peña, R, Zelaya Blandón, E., Persson, L.-Å., Källestål,  
499 C. Food insecurity and self-rated health in rural Nicaraguan women of  
500 reproductive age: a cross-sectional study. *Journal for Equity in Health* 2018;17:  
501 146. [doi.org/10.1186/s12939-018-0854-5](https://doi.org/10.1186/s12939-018-0854-5)

- 502 22. Banerjee A, Duflo E, Goldberg N, Karlan D, Osei R, Pariente W, et al. A  
503 multifaceted program causes lasting progress for the very poor: Evidence from six  
504 countries. *Science*. 2015 May 14;348: 1260799–9.
- 505 23. Mitchell S, Gellman A, Ross R, Chen J, Bari S, Huynh UK, et al. The Millennium  
506 Villages Project: a retrospective, observational, endline evaluation. *The Lancet*  
507 *Global Health*. 2018 Mar 30;6: e500–13.

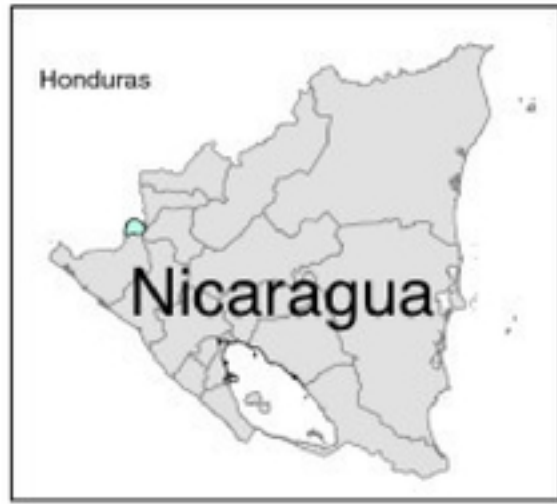

bioRxiv preprint doi: <https://doi.org/10.1101/593426>; this version posted March 29, 2019. The copyright holder for this preprint (which was not certified by peer review) is the author/funder, who has granted bioRxiv a license to display the preprint in perpetuity. It is made available under aCC-BY 4.0 International license.

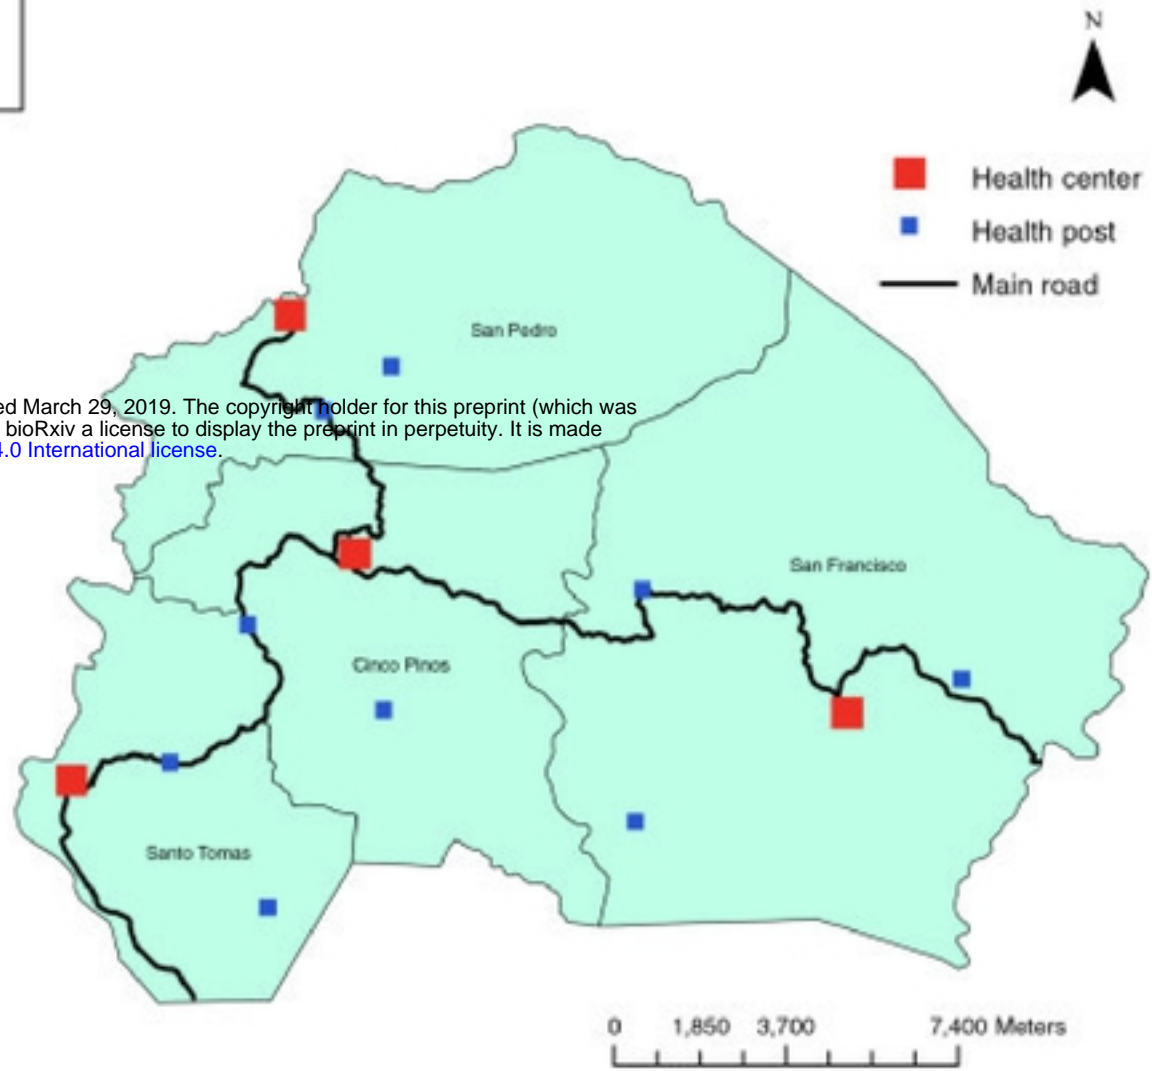

Fig 1
